# Supplementary material for: Neuronal atg1 Coordinates Autophagy Induction and Physiological Adaptations to Balance mTORC1 Signalling
Source: MDPI journal article supplement (doi:10.3390/cells12162024), 2023-08-08
Supplement: s1 [file s1]

**Table S1. List of transgenic flies used in the study.**

| <b>Gal4 driver</b>                          | <b>Tissue specificity</b>                  |
|---------------------------------------------|--------------------------------------------|
| <i>Elav<sup>c155</sup></i> (BDSC:458)       | Nervous system                             |
| 129Y (BDSC:30816)                           | Antennal nerves and subesophageal ganglia  |
| GH146 (BDSC:3026)                           | Antennal lobes                             |
| OK107 (BDSC:854)                            | Mushroom bodies                            |
| C232 (BDSC:30828)                           | Ellipsoid bodies                           |
| C601 (BDSC:30844)                           | Protocerebrum                              |
| C205 (BDSC:30826)                           | Fan shaped body and subesophageal ganglia  |
| <i>Nmdar2</i> (BDSC:46860)                  | NMDA receptor expressing cells             |
| <i>Dilp2</i> (BDSC:37516)                   | Insulin-like peptide 2 expressing cells    |
| R29H01 (BDSC:47343)                         | Prothoracic gland innervating cells        |
| <i>Trh</i> (BDSC:38389)                     | Serotonergic cells                         |
| <i>ElavGS</i> (BDSC:43642)                  | Nervous system<br>(mifepristone inducible) |
| <i>Sca</i> (BDSC:6479)                      | Epidermis                                  |
| C929 (BDSC:25373)                           | Peptidergic cells                          |
| 5htr7 (by C. Nichols)                       | 5HTR7 serotonin receptor expressing cells  |
|                                             |                                            |
| <b>UAS line</b>                             | <b>Effect on gene expression</b>           |
| UAS-SggS9A (BDSC:5255)                      | Constitutive expression                    |
| UAS-S6K <sup>STDETE</sup> (by L. Partridge) | Constitutive expression                    |
| UAS-5htr7 (by J. Dow)                       | Overexpression                             |
| UAS-atg1 (BDSC:51654)                       | Overexpression                             |
| UAS-gfpser (BDSC:24463)                     | Overexpression                             |
| UAS-cd8rfp (BDSC:27392)                     | Overexpression                             |
| UAS-Epac1-camps (BDSC:25408)                | Overexpression                             |
| UAS-sytegfp (BDSC:6925)                     | Overexpression                             |
| UAS-atg1RNAi (VDRC:16133)                   | Inhibition                                 |
| UAS-sertRNAi (VDRC:100584)                  | Inhibition                                 |
| UAS-5htr7RNAi (VDRC:104804)                 | Inhibition                                 |
| UAS-atg7RNAi (VDRC:27432)                   | Inhibition                                 |
| UAS-5htr1bRNAi (VDRC:110128)                | Inhibition                                 |
| UAS-nmdar2RNAi (VDRC:12187)                 | Inhibition                                 |
| UAS-caspase3RNAi (VDRC:43028)               | Inhibition                                 |
| UAS-rutabagaRNAi (VDRC:5569)                | Inhibition                                 |
| UAS-pka <sup>c1</sup> RNAi (VDRC:31599)     | Inhibition                                 |

The *Gal4* and *UAS* transgenic *Drosophila* lines used in the study.

**Figure S1. ATG7 is not required for rapamycin-induced behaviours.**

**a.**

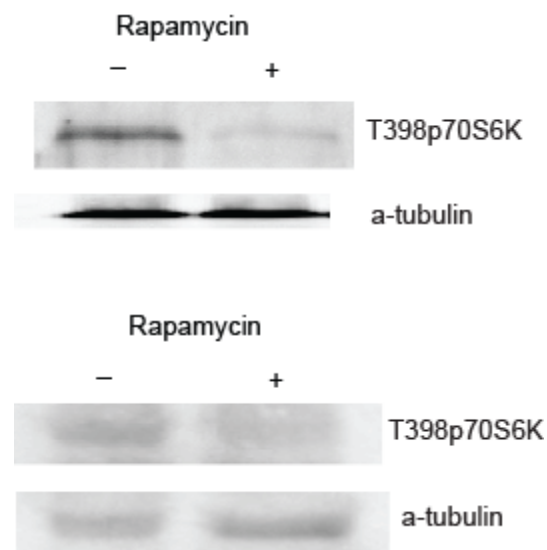

**b.**

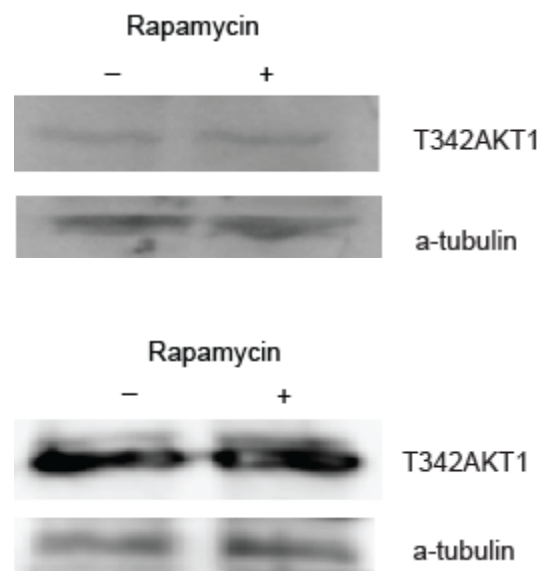

c.

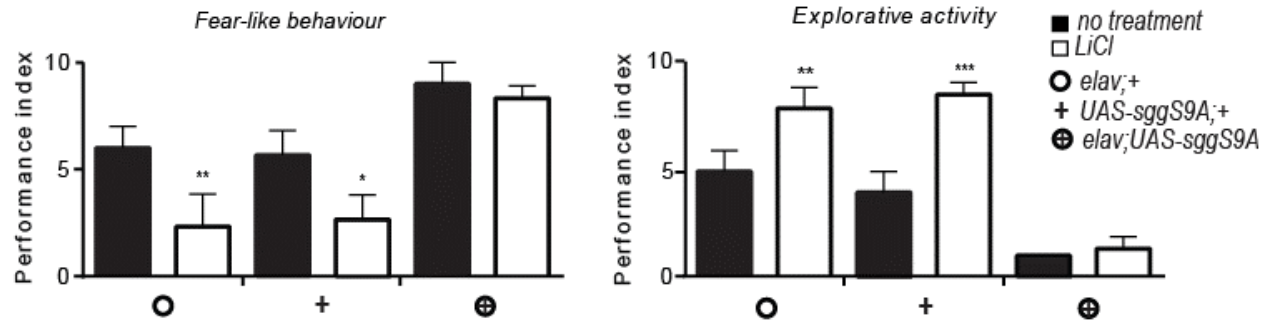

d.

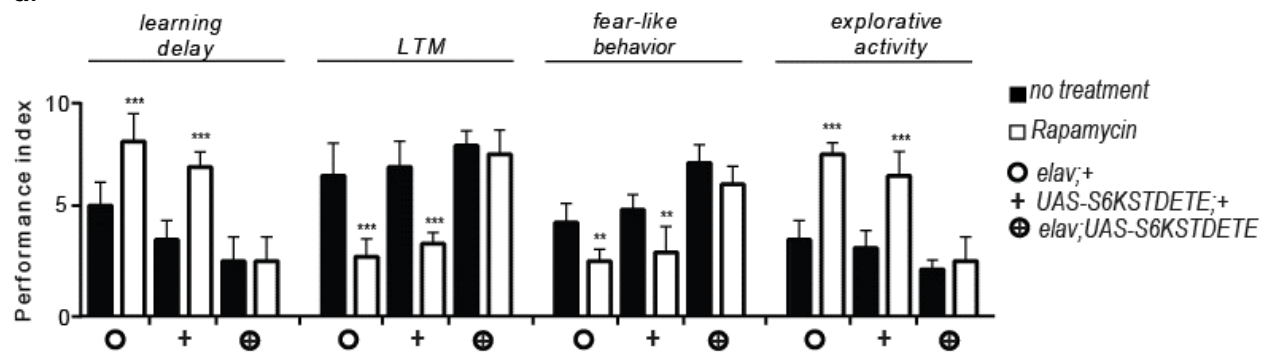

e.

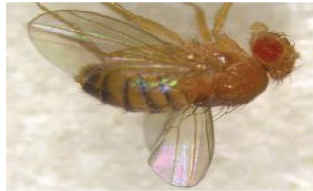

f.

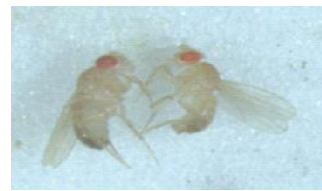

g.

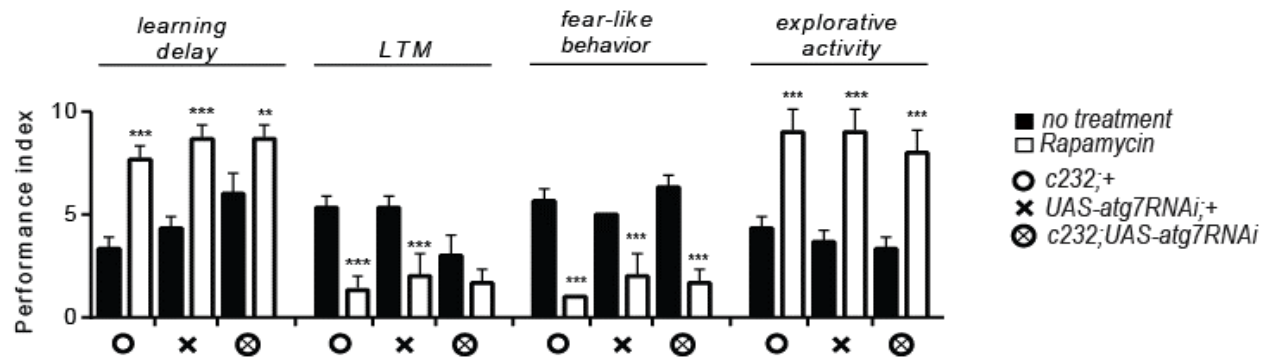

**h.**

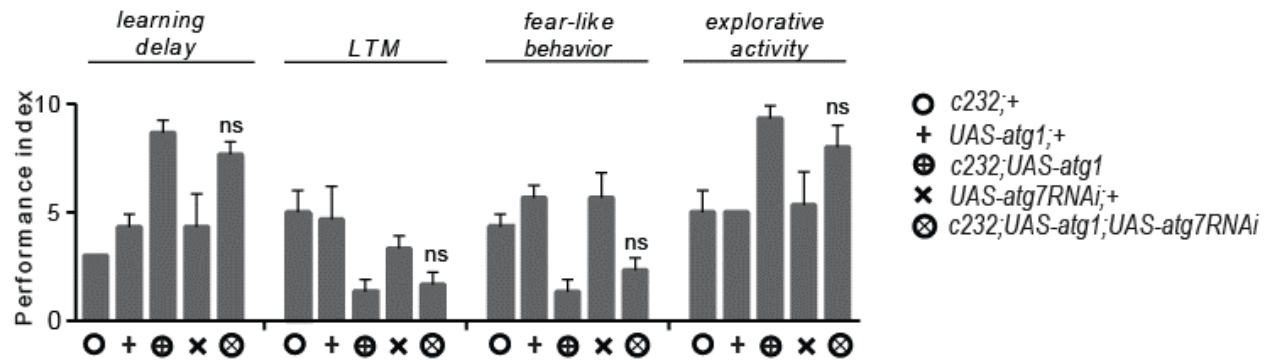

**a)** Acute rapamycin treatment (four days) of ten-day old female mated flies decreases phosphorylation of p70S6K at T398.

**b)** AKT1 phosphorylation at T342 in *Drosophila* heads is not affected by rapamycin feeding.

**c)** LiCl treatment (three-day feeding) induces similar to rapamycin treatment effects on behaviour, while constitutive GSK-3 $\beta$  activation causes opposite to rapamycin treatment effects (n=3). Ten-day old mated female flies were used. For fear-like behaviour:  $F(5, 12) = 18.87$ , for explorative activity:  $F(5, 12) = 51.27$ . One-way ANOVA, individual comparisons by Sidak's multiple comparisons test.

**d)** Rapamycin treatment (four-days) affects cognition/behaviour via neuronal mTORC1 (n=5). Ten-day old mated female flies were used. For learning delay:  $F(5, 24) = 24.40$ , for LTM:  $F(5, 24) = 22.60$ , for fear-like behaviour:  $F(5, 24) = 21.30$ , for explorative activity:  $F(5, 24) = 32.84$ . One-way ANOVA, individual comparisons by Sidak's multiple comparisons test.

**e)** *elavGS;UAS-atg1RNAi* adults exhibited restricted loss of eyes' pigmentation in the absence of mifepristone.

**f)** Mifepristone-induced neuronal *atg1* expression throughout development caused lethality. Very few death escapers had reduced size. Left side: *elavGS;UAS-atg1* male fed with normal food. Right side: *elavGS;UAS-atg1* male fed with mifepristone-enriched food.

**g)** RNAi of *atg7* does not blunt rapamycin effects on behaviour (n=3). Ten-day old flies were fed with rapamycin for four days. For learning delay:  $F(5, 12) = 34.70$ , for LTM:  $F(5, 12) = 17.68$ , for fear-like behaviour:  $F(5, 12) = 48.17$ , for explorative activity:  $F(5, 12) = 33.33$ . One-way ANOVA, individual comparisons by Sidak's multiple comparisons test.

**h)** Ellipsoid bodies-specific ATG7 is not required for *atg1*-induced behaviours (n=3). Three-day old flies were used. For learning delay:  $F(4, 10) = 26.60$ , for LTM:  $F(4, 10) = 9.731$ , for fear-like behaviour:  $F(4, 10) = 21.75$ , for explorative activity:  $F(4, 10) = 12.96$ . One-way ANOVA, individual comparisons by Sidak's multiple comparisons test, selected pairs: *c232;UAS-atg1* vs. *c232;UAS-atg1;UAS-atg7RNAi*.

\*\*\* $p < 0.001$ , \*\* $p < 0.01$ , and \* $p < 0.05$ . Error bars represent s.e.m.

**Figure S2. *5htr7* inhibition ameliorates low nutrient diet-evoked cognitive and behavioural effects.**

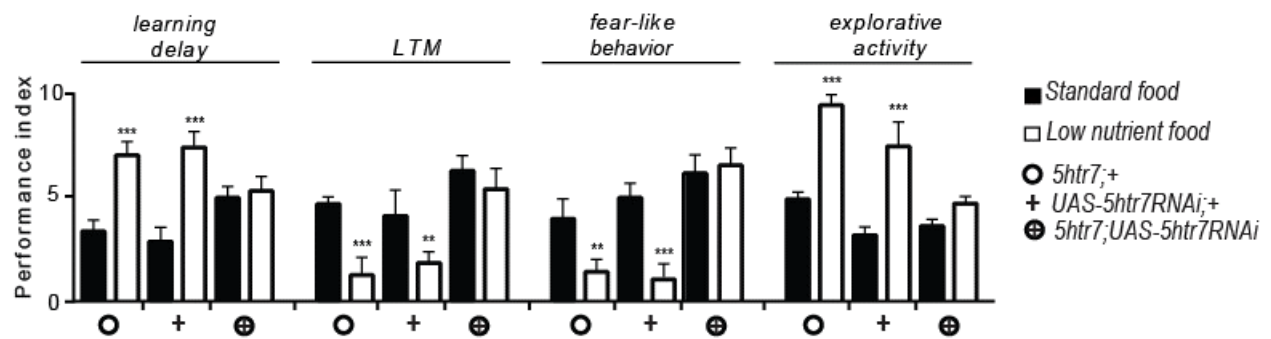

*5htr7* inhibition ameliorates low nutrient diet-evoked cognitive and behavioural effects (n=5). Ten-day old flies were fed with low nutrient food for two days. For learning delay:  $F(5, 24) = 21.19$ , for LTM:  $F(5, 24) = 8.02$ , for fear-like behaviour:  $F(5, 12) = 7.37$ , for explorative activity:  $F(5, 24) = 39.67$ . One-way ANOVA, individual comparisons by Sidak's multiple comparisons test.

\*\*\* $p < 0.001$ , \*\* $p < 0.01$ , and \* $p < 0.05$ . Error bars represent s.e.m.

**Figure S3. Serotonergic cells-specific and SERT inhibition increases 5HTR7 levels in *Drosophila* heads.**

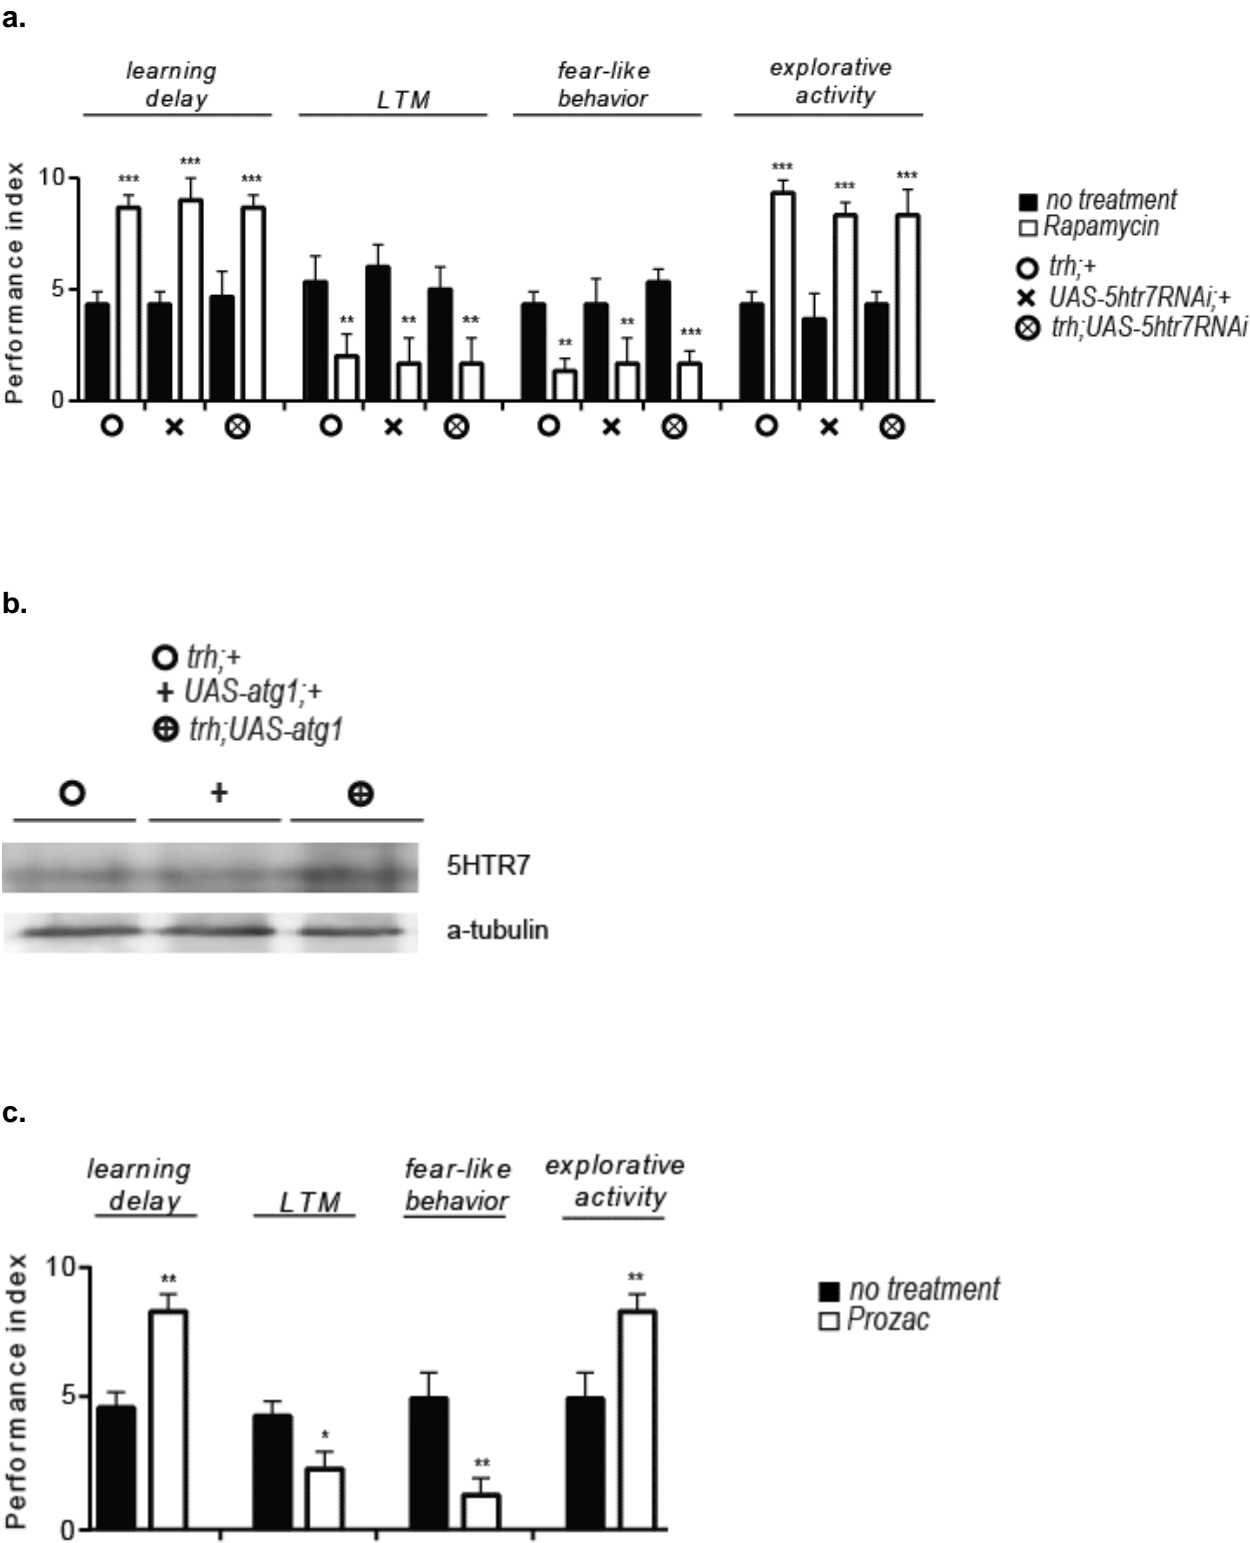

d.

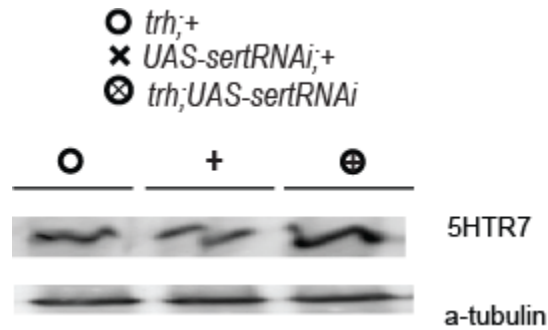

**a)** Serotonin-producing cells-specific *5htr7RNAi* expression did not block rapamycin effects (n=3). Ten-day old flies were fed with rapamycin for four days. For learning delay: F (5, 12) = 27.80, for LTM: F (5, 12) = 10.68, for fear-like behaviour: F (5, 12) = 13.73, for explorative activity: F (5, 12) = 28.88. One-way ANOVA, individual comparisons by Sidak's multiple comparisons test.

**b)** *Trh*; *UAS-atg1* flies have increased expression of 5HTR7 in the heads. 3-day old flies were used.

**c)** Acute (two days) Prozac treatment (100μM) of ten-day old *W<sup>Dah</sup>* flies induces similar to rapamycin treatment effects on behaviour and cognition (n=3). Individual comparisons by two-tailed Mann Whitney test.

**d)** Inhibition of serotonin transporter via RNAi increases 5HTR7 levels in *Drosophila* heads. 3-day old flies were used.

\*\*\*p<0.001, \*\*p<0.01, and \*p<0.05. Error bars represent s.e.m.

Figure S4. RNAi inhibition of *5htr7* at NMDAR2-expressing cells ameliorates rapamycin effects on behaviour/cognition.

a.

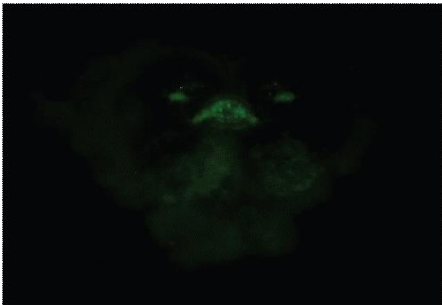

b.

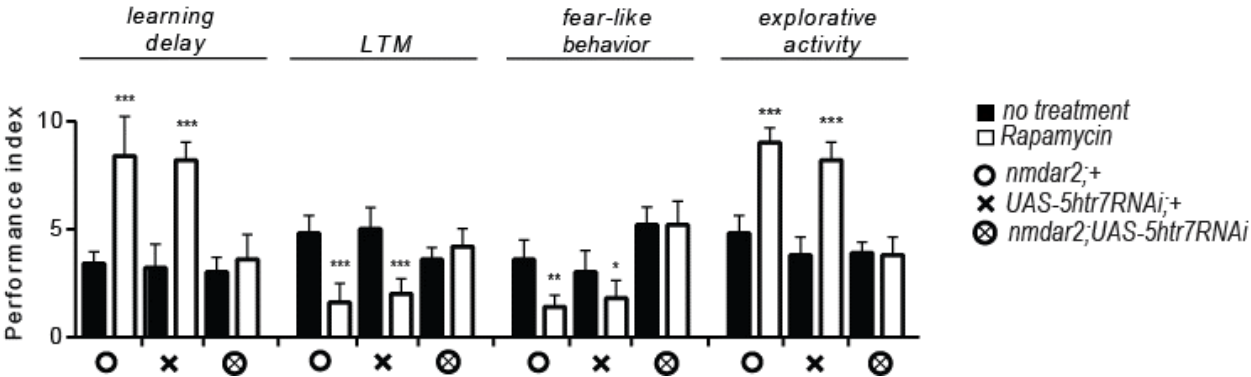

c.

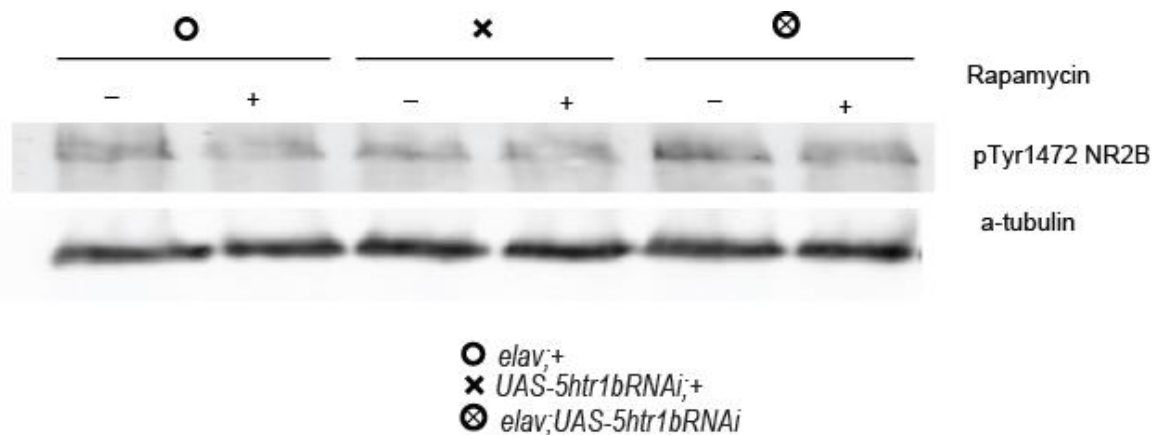

**a)** *Nmdar2* is mainly expressed the ellipsoid bodies and fan-shaped body in *Drosophila* brain (dissected brain of *nmdar2:UAS-sytagfp* flies, posterior view).

**b)** Behaviour and cognitive performance of flies with RNAi inhibition of *5htr7* at NMDAR2-expressing cells are not affected by rapamycin (n=5). Ten-day old flies were treated for four days with rapamycin. For learning delay:  $F(5, 24) = 27.58$ , for LTM:  $F(5, 24) = 15.44$ , for fear-like behaviour:  $F(5, 24) = 16.89$ , for explorative activity:  $F(5, 24) = 44.22$ . One-way ANOVA, individual comparisons by Sidak's multiple comparisons test.

\*\*\* $p < 0.001$ , \*\* $p < 0.01$ , and \* $p < 0.05$ . Error bars represent s.e.m.

**c)** Paneuronal RNAi inhibition of *5htr1b* increased Tyr1472 phosphorylation of NMDAR2 receptor, while it did not inhibit rapamycin-induced de-phosphorylation of NMDAR2 in *Drosophila* heads. Ten-day old flies were rapamycin-treated for four days.

**Figure S5. T-maze and learning protocol for zebrafish analysis.**

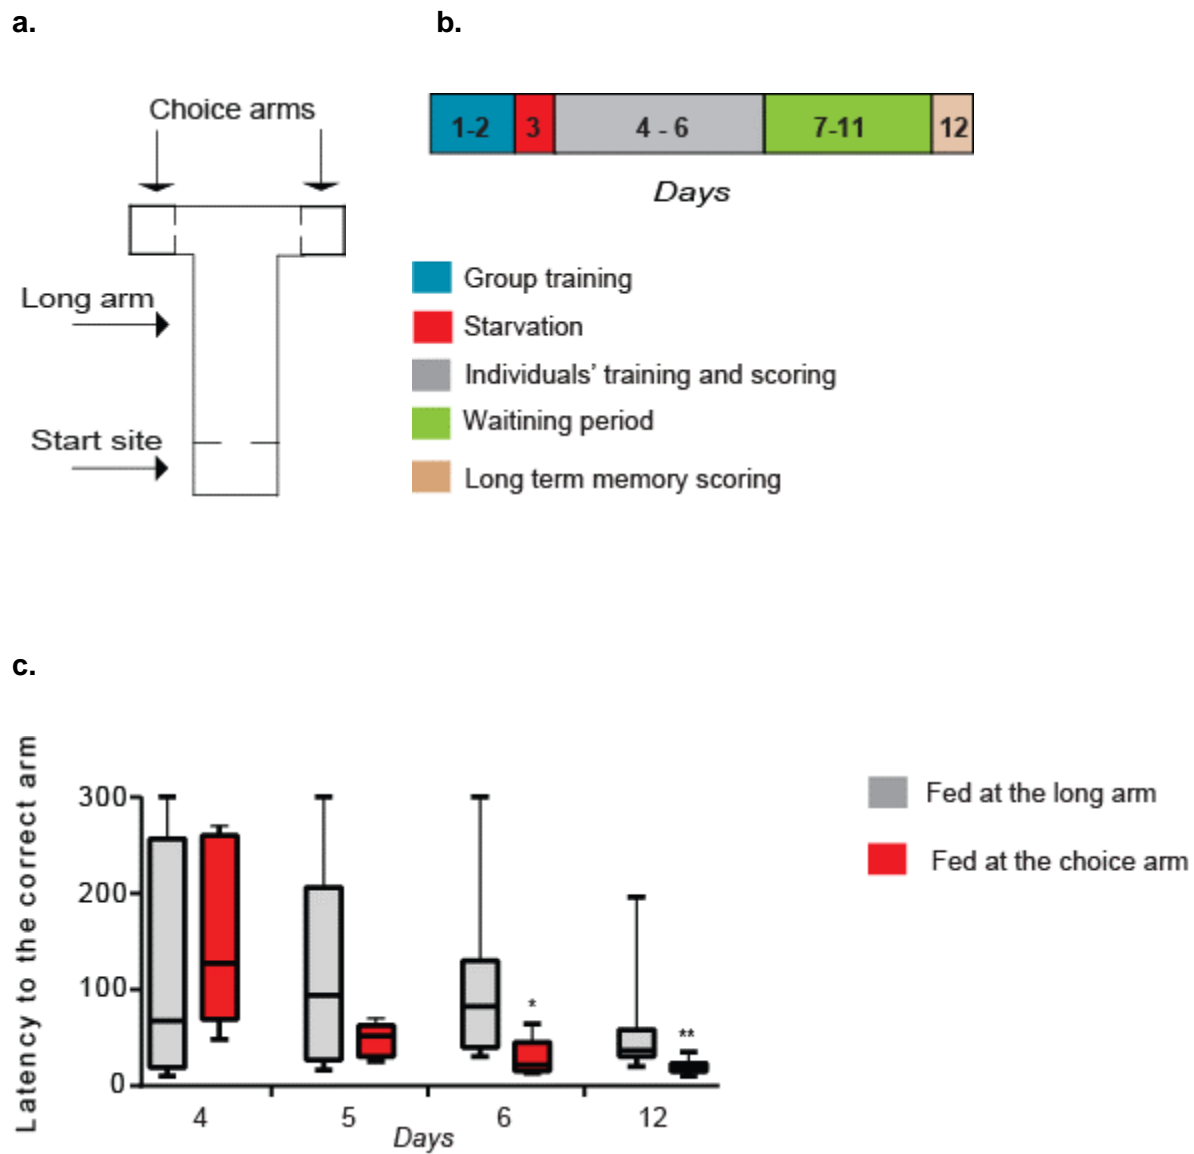

**a-b)** T-maze and learning protocol.

**c)** Zebrafish learns to locate food sources after training and retain relative memory for at least six days after the end of training. Two-tailed Mann Whitney test ( $n=8$ ).

\*\* $p<0.01$ , and \* $p<0.05$ . Error bars represent s.e.m.
